# Supplementary material for: A consistent dataset for the net income distribution for 190 countries, aggregated to 32 geographical regions and the world from 1958–2015
Source: Copernicus journal article supplement (doi:10.5194/essd-2023-137), 2023-05-16
Supplement: Supplementary file 1 [file essd-2023-137-supplement.pdf]

## ***SUPPLEMENTARY INFORMATION***

For “A consistent dataset for the net income distribution for 190 countries, aggregated to 32 geographical regions and the world from 1958-2015”

- **SI 1- Tables related to input data, mapping files (Pg 1-8)**
- **SI 2- Tables and figures related to PCA model, historical trends in income distributions (Pg 9-12)**
- **SI 3- Tables related to data validation (Pg 12-14)**

*SI Table 1: Examples of research studies in UNU WIDER dataset. Example below shows income distribution data sources from research studies for 1 country (China)*

| <b>Source</b>                                                             | <b>Data</b>    |
|---------------------------------------------------------------------------|----------------|
| Dowling and Soo 1983                                                      | Income (net)   |
| Chai and Chai 1994                                                        | Income (net)   |
| Chotikapanich et al. 2005                                                 | Income (net)   |
| Zhang                                                                     | Income (net)   |
| Ravallion and Chen 2007                                                   | Income (net)   |
| World Bank 2019                                                           | Income (net)   |
| World Bank 2002                                                           | Income (gross) |
| Benjamin et al. 2005                                                      | Income (gross) |
| Benjamin et al. 2005                                                      | Consumption    |
| Chuliang et al. 2018                                                      | Income (net)   |
| Khan and Riskin 1998                                                      | Income (net)   |
| Liu and Li 2011                                                           | Consumption    |
| World Bank 2002                                                           | Income (net)   |
| World Bank 2019                                                           | Consumption    |
| Cai et al. 2010                                                           | Income (net)   |
| Cai et al. 2010                                                           | Consumption    |
| Xia et al. 2017                                                           | Consumption    |
| Luxembourg Income Study (LIS) 2019                                        | Income (net)   |
| Luxembourg Income Study (LIS) 2019                                        | Consumption    |
| China Institute for Income Distribution at Beijing Normal University 2018 | Income (net)   |

|                                                                           |              |
|---------------------------------------------------------------------------|--------------|
| China Institute for Income Distribution at Beijing Normal University 2018 | Consumption  |
| Li 2005                                                                   | Income (net) |
| National Bureau of Statistics of China                                    | Income (net) |
| Institute of Social Science Survey of Peking University                   | Income (net) |
| OECD 2018                                                                 | Income (net) |
| OECD 2019                                                                 | Income (net) |

*SI Table 2: ISO to GCAM region mapping table*

| <b>iso</b> | <b>GCAM_region_ID</b> | <b>GCAM region name</b> |
|------------|-----------------------|-------------------------|
| abw        | 9                     | Latin America           |
| afg        | 27                    | Southeast Asia          |
| ago        | 4                     | Africa                  |
| aia        | 9                     | Latin America           |
| alb        | 15                    | Eastern Europe          |
| and        | 13                    | Western Europe          |
| ant        | 9                     | Latin America           |
| are        | 21                    | Middle East             |
| arg        | 31                    | Latin America           |
| arm        | 10                    | Former Soviet Union     |
| asm        | 29                    | Southeast Asia          |
| atg        | 9                     | Latin America           |
| aus        | 6                     | Australia_NZ            |
| aut        | 13                    | Western Europe          |
| aze        | 10                    | Former Soviet Union     |
| bdi        | 2                     | Africa                  |
| bel        | 13                    | Western Europe          |
| ben        | 5                     | Africa                  |
| bfa        | 5                     | Africa                  |
| bgd        | 27                    | Southeast Asia          |
| bgr        | 12                    | Eastern Europe          |

|     |    |                     |
|-----|----|---------------------|
| bhr | 21 | Middle East         |
| bhs | 9  | Latin America       |
| bih | 15 | Eastern Europe      |
| blr | 14 | Former Soviet Union |
| blz | 9  | Latin America       |
| bmu | 9  | Western Europe      |
| bol | 26 | Latin America       |
| bra | 7  | Latin America       |
| brb | 9  | Latin America       |
| brn | 29 | Southeast Asia      |
| btn | 27 | Southeast Asia      |
| bwa | 4  | Africa              |
| caf | 5  | Africa              |
| can | 8  | Canada              |
| cck | 29 | Southeast Asia      |
| che | 16 | Western Europe      |
| chi | 13 | Western Europe      |
| chl | 26 | Latin America       |
| chn | 11 | China               |
| civ | 5  | Africa              |
| cmr | 5  | Africa              |
| cod | 5  | Africa              |
| cog | 5  | Africa              |
| cok | 29 | Australia_NZ        |
| col | 32 | Latin America       |
| com | 2  | Africa              |
| cpv | 5  | Africa              |
| cri | 9  | Latin America       |
| cub | 9  | Latin America       |
| cuw | 9  | Latin America       |
| cym | 9  | Latin America       |
| cyp | 12 | Western Europe      |
| cxr | 29 | Southeast Asia      |
| cze | 12 | Eastern Europe      |
| deu | 13 | Western Europe      |
| dji | 2  | Africa              |
| dma | 9  | Latin America       |
| dnk | 13 | Western Europe      |
| dom | 9  | Latin America       |
| dza | 3  | Africa              |

|     |    |                     |
|-----|----|---------------------|
| ecu | 26 | Latin America       |
| egy | 3  | Africa              |
| eri | 2  | Africa              |
| esh | 3  | Africa              |
| esp | 13 | Western Europe      |
| est | 12 | Former Soviet Union |
| eth | 2  | Africa              |
| fin | 13 | Western Europe      |
| fji | 29 | Southeast Asia      |
| flk | 13 | Latin America       |
| fra | 13 | Western Europe      |
| fro | 13 | Western Europe      |
| fsm | 29 | Southeast Asia      |
| gab | 5  | Africa              |
| gbr | 13 | Western Europe      |
| geo | 10 | Former Soviet Union |
| ggy | 13 | Western Europe      |
| gha | 5  | Africa              |
| gib | 13 | Western Europe      |
| gin | 5  | Africa              |
| glp | 9  | Latin America       |
| gmb | 5  | Africa              |
| gnb | 5  | Africa              |
| gnq | 5  | Africa              |
| grc | 13 | Western Europe      |
| grd | 9  | Latin America       |
| grl | 13 | Western Europe      |
| gtm | 9  | Latin America       |
| guf | 25 | Latin America       |
| gum | 29 | Southeast Asia      |
| guy | 25 | Latin America       |
| hkg | 11 | Southeast Asia      |
| hnd | 9  | Latin America       |
| hrv | 15 | Eastern Europe      |
| hti | 9  | Latin America       |
| hun | 12 | Eastern Europe      |
| idn | 18 | Southeast Asia      |
| imn | 13 | Western Europe      |
| ind | 17 | India               |
| irl | 13 | Western Europe      |

|     |    |                     |
|-----|----|---------------------|
| irn | 21 | Middle East         |
| irq | 21 | Middle East         |
| isl | 16 | Western Europe      |
| isr | 21 | Middle East         |
| ita | 13 | Western Europe      |
| jam | 9  | Latin America       |
| jey | 13 | Western Europe      |
| jor | 21 | Middle East         |
| jpn | 19 | Japan               |
| kaz | 10 | Former Soviet Union |
| ken | 2  | Africa              |
| kgz | 10 | Former Soviet Union |
| khm | 29 | China               |
| kir | 29 | Southeast Asia      |
| kna | 9  | Latin America       |
| kor | 28 | Korea               |
| kwt | 21 | Middle East         |
| lao | 29 | Southeast Asia      |
| lbn | 21 | Middle East         |
| lbr | 5  | Africa              |
| lby | 3  | Africa              |
| lca | 9  | Latin America       |
| lie | 16 | Western Europe      |
| lka | 27 | Southeast Asia      |
| lso | 4  | Africa              |
| ltu | 12 | Former Soviet Union |
| lux | 13 | Western Europe      |
| lva | 12 | Former Soviet Union |
| mac | 11 | Southeast Asia      |
| mar | 3  | Africa              |
| mco | 13 | Western Europe      |
| mda | 14 | Former Soviet Union |
| mdg | 2  | Africa              |
| mdv | 27 | Southeast Asia      |
| mex | 20 | Latin America       |
| mhl | 29 | Southeast Asia      |
| mkd | 15 | Eastern Europe      |

|     |    |                |
|-----|----|----------------|
| mli | 5  | Africa         |
| mlt | 12 | Western Europe |
| mmr | 29 | Southeast Asia |
| mne | 15 | Eastern Europe |
| mng | 10 | China          |
| mnp | 29 | Southeast Asia |
| moz | 4  | Africa         |
| mrt | 5  | Africa         |
| msr | 9  | Latin America  |
| mtq | 9  | Western Europe |
| mus | 2  | Africa         |
| mwi | 4  | Africa         |
| mys | 29 | Southeast Asia |
| myt | 29 | Africa         |
| nam | 4  | Africa         |
| ncl | 29 | Southeast Asia |
| ner | 5  | Africa         |
| nfk | 29 | Australia_NZ   |
| nga | 5  | Africa         |
| nic | 9  | Latin America  |
| niu | 29 | Australia_NZ   |
| nld | 13 | Western Europe |
| nor | 16 | Western Europe |
| npl | 27 | Southeast Asia |
| nru | 29 | Southeast Asia |
| nzl | 6  | Australia_NZ   |
| omn | 21 | Middle East    |
| pak | 22 | Southeast Asia |
| pan | 9  | Latin America  |
| pci | 29 | Southeast Asia |
| pcn | 29 | Southeast Asia |
| per | 26 | Latin America  |
| phl | 29 | Southeast Asia |
| plw | 29 | Southeast Asia |
| png | 29 | Southeast Asia |
| pol | 12 | Eastern Europe |
| pri | 1  | USA            |
| prk | 29 | China          |
| prt | 13 | Western Europe |
| pry | 26 | Latin America  |
| pse | 21 | Middle East    |

|     |    |                     |
|-----|----|---------------------|
| pyf | 29 | Southeast Asia      |
| qat | 21 | Middle East         |
| reu | 2  | Africa              |
| rom | 12 | Eastern Europe      |
| rus | 23 | Former Soviet Union |
| rwa | 2  | Africa              |
| sau | 21 | Middle East         |
| scg | 15 | Eastern Europe      |
| sdn | 2  | Africa              |
| sen | 5  | Africa              |
| sgp | 29 | Southeast Asia      |
| shn | 13 | Africa              |
| sjm | 16 | Western Europe      |
| slb | 29 | Southeast Asia      |
| sle | 5  | Africa              |
| slv | 9  | Latin America       |
| smr | 13 | Western Europe      |
| som | 2  | Africa              |
| spm | 13 | Canada              |
| srb | 15 | Eastern Europe      |
| ssd | 2  | Africa              |
| stp | 5  | Africa              |
| sur | 25 | Latin America       |
| svk | 12 | Eastern Europe      |
| svn | 12 | Eastern Europe      |
| swe | 13 | Western Europe      |
| swz | 4  | Africa              |
| syc | 29 | Africa              |
| syr | 21 | Middle East         |
| tca | 13 | Latin America       |
| tcd | 5  | Africa              |
| tgo | 5  | Africa              |
| tha | 29 | Southeast Asia      |
| tjk | 10 | Former Soviet Union |
| tkl | 29 | Australia_NZ        |
| tkm | 10 | Former Soviet Union |
| tls | 29 | Southeast Asia      |
| ton | 29 | Southeast Asia      |
| tto | 9  | Latin America       |

|     |    |                     |
|-----|----|---------------------|
| tun | 3  | Africa              |
| tur | 15 | Western Europe      |
| tuv | 29 | Southeast Asia      |
| twm | 30 | Southeast Asia      |
| tza | 4  | Africa              |
| uga | 2  | Africa              |
| ukr | 14 | Former Soviet Union |
| ury | 33 | Latin America       |
| usa | 1  | USA                 |
| uzb | 10 | Former Soviet Union |
| vat | 13 | Western Europe      |
| vct | 9  | Latin America       |
| ven | 25 | Latin America       |
| vgb | 13 | Latin America       |
| vir | 1  | Latin America       |
| vnm | 29 | China               |
| vut | 29 | Southeast Asia      |
| wlf | 13 | Australia_NZ        |
| wsm | 29 | Southeast Asia      |
| yem | 21 | Middle East         |
| yug | 15 | Eastern Europe      |
| zaf | 24 | Africa              |
| zmb | 4  | Africa              |
| zwe | 4  | Africa              |



SI 2 Figure 1: Comparison of fit of lognormal functional form (grey dots) with PCA based fit (orange dots) with data for each decile (facet). Lines represent 1 to 1 fit between x and y axis. Income shares are expressed as a percent of total income.

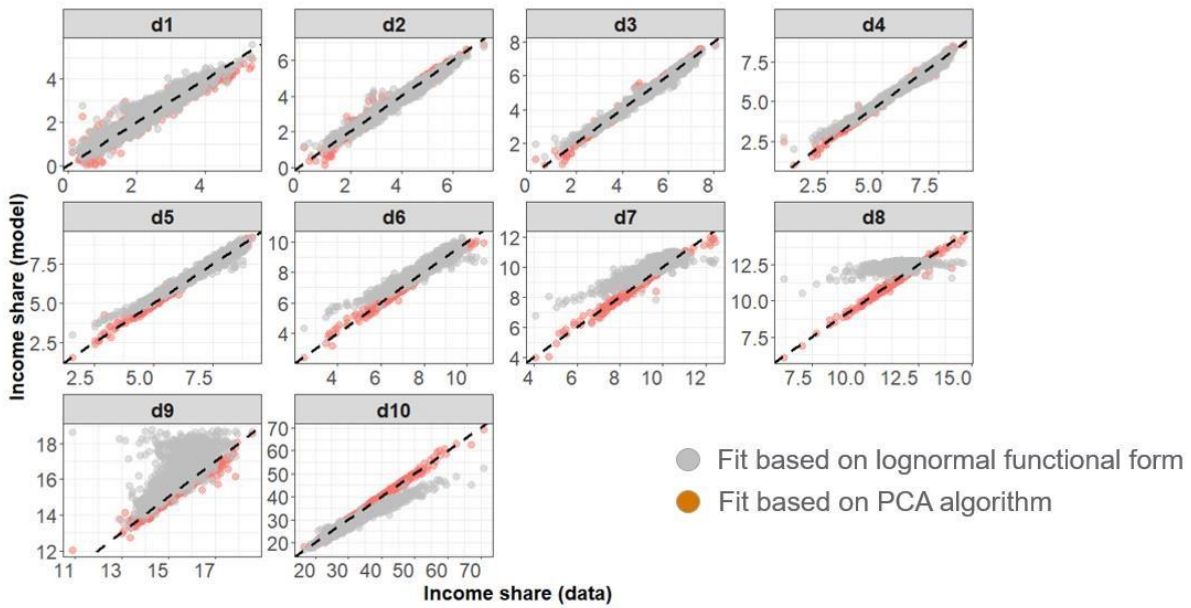

*SI 2 Table 3: Principal Component values for first two components (PC1, PC2). Component values calculated based on centered and scaled data.*

| Population decile | PC1   | PC2   |
|-------------------|-------|-------|
| 1                 | -0.31 | -0.27 |
| 2                 | -0.33 | -0.19 |
| 3                 | -0.34 | -0.12 |
| 4                 | -0.34 | -0.04 |
| 5                 | -0.34 | 0.04  |
| 6                 | -0.34 | 0.15  |
| 7                 | -0.32 | 0.31  |
| 8                 | -0.22 | 0.63  |
| 9                 | 0.23  | 0.59  |
| 10                | 0.34  | -0.10 |

SI 2 Figure 2: Principal Components 1 and 2 compared to historical data on net income distributions (grey lines) for all countries in 2015. The y axis values are the 10-point functional forms for PC1 (blue line) and PC2 (red line) from Table 8 and the actual income shares for each country's income distribution

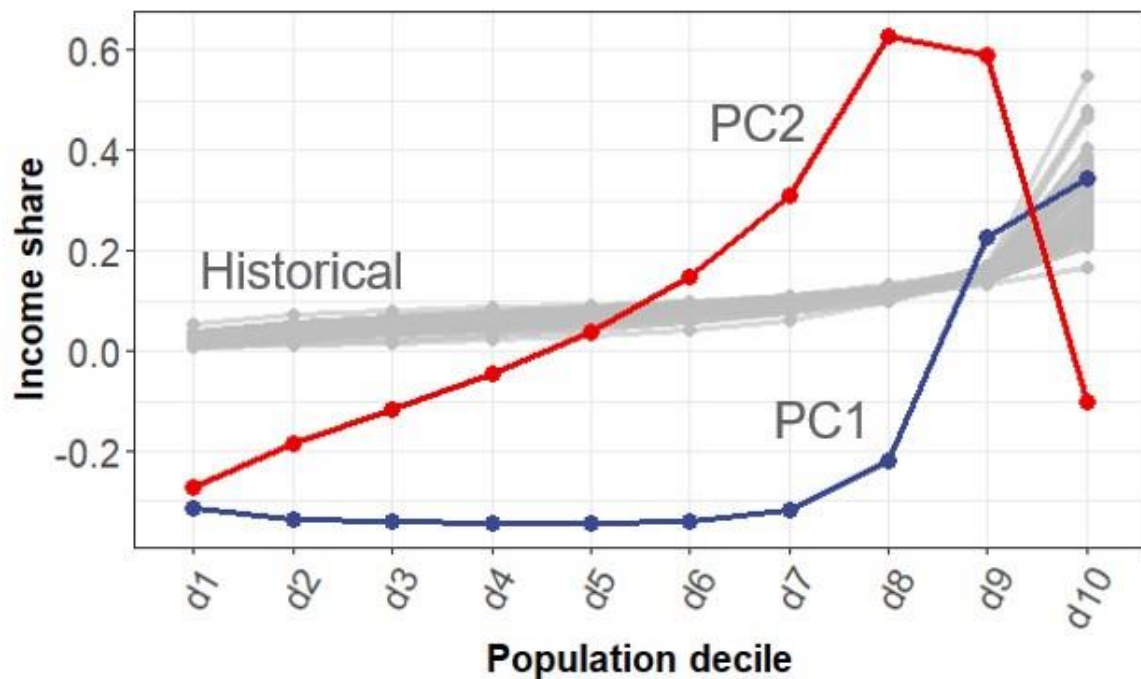

SI 2 Figure 3: GINI coefficient in Malawi over time

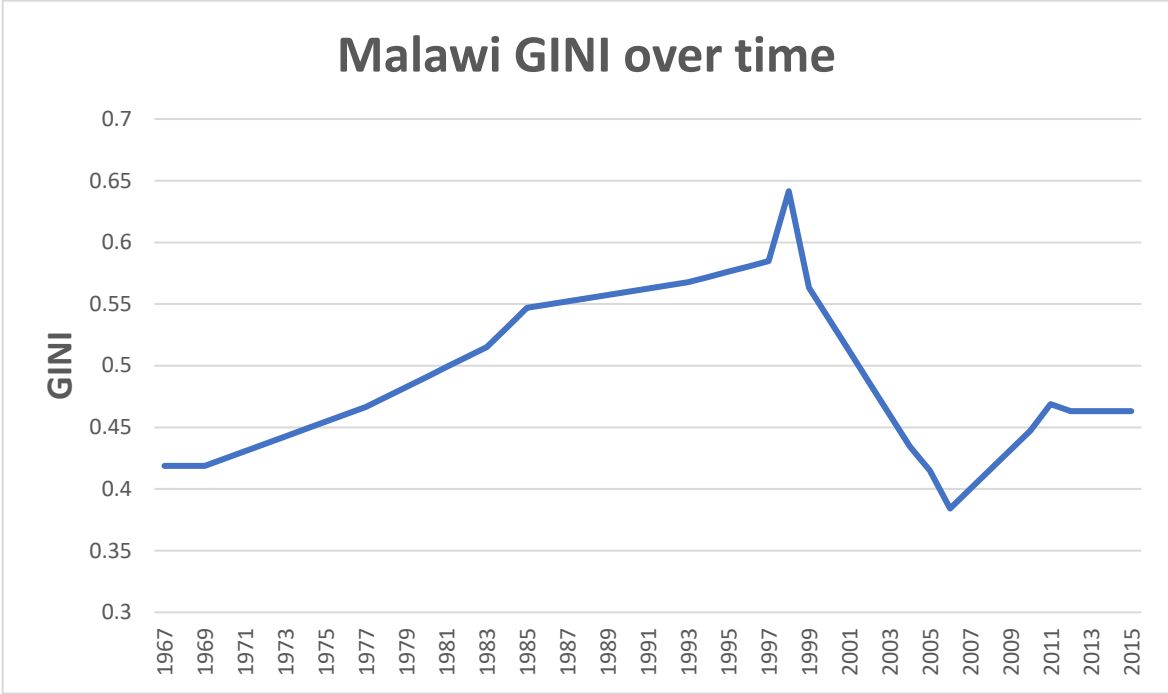

SI 3 Table 4: Population coverage at the regional level based on country level data for 5 years (2010-2015). Color scheme indicates high (green) to low coverage.

| GCAM_region_name                | 2010 | 2011 | 2012 | 2013 | 2014 | 2015 |
|---------------------------------|------|------|------|------|------|------|
| USA                             | 100% | 100% | 100% | 100% | 100% | 100% |
| Africa_Eastern                  | 64%  | 64%  | 30%  | 21%  | 8%   | 0%   |
| Africa_Northern                 | 77%  | 77%  | 71%  | 50%  | 50%  | 50%  |
| Africa_Southern                 | 85%  | 80%  | 59%  | 27%  | 27%  | 27%  |
| Africa_Western                  | 99%  | 56%  | 50%  | 45%  | 23%  | 9%   |
| Australia_NZ                    | 100% | 100% | 100% | 100% | 100% | 16%  |
| Brazil                          | 100% | 100% | 100% | 100% | 100% | 100% |
| Canada                          | 100% | 100% | 100% | 100% | 100% | 100% |
| Central America and Caribbean   | 82%  | 82%  | 82%  | 70%  | 69%  | 43%  |
| Central Asia                    | 48%  | 48%  | 48%  | 48%  | 48%  | 44%  |
| China                           | 99%  | 99%  | 99%  | 99%  | 99%  | 99%  |
| EU-12                           | 80%  | 80%  | 80%  | 80%  | 80%  | 80%  |
| EU-15                           | 100% | 100% | 100% | 100% | 100% | 100% |
| Europe_Eastern                  | 100% | 100% | 100% | 100% | 100% | 100% |
| Europe_Non_EU                   | 100% | 100% | 96%  | 93%  | 94%  | 93%  |
| European Free Trade Association | 100% | 100% | 100% | 100% | 100% | 100% |
| India                           | 100% | 100% | 100% | 0%   | 0%   | 0%   |
| Indonesia                       | 100% | 100% | 100% | 100% | 100% | 100% |
| Japan                           | 100% | 100% | 100% | 100% | 100% | 100% |
| Mexico                          | 100% | 100% | 100% | 100% | 100% | 0%   |
| Middle East                     | 83%  | 83%  | 81%  | 65%  | 47%  | 37%  |
| Pakistan                        | 97%  | 95%  | 100% | 100% | 100% | 0%   |
| Russia                          | 100% | 100% | 100% | 100% | 100% | 100% |
| South Africa                    | 100% | 100% | 100% | 100% | 100% | 100% |
| South America_Northern          | 97%  | 95%  | 95%  | 95%  | 95%  | 0%   |
| South America_Southern          | 100% | 100% | 100% | 100% | 100% | 100% |
| South Asia                      | 100% | 34%  | 23%  | 9%   | 0%   | 0%   |
| South Korea                     | 100% | 100% | 100% | 100% | 100% | 100% |
| Southeast Asia                  | 76%  | 75%  | 73%  | 73%  | 72%  | 54%  |
| Taiwan                          | 100% | 100% | 100% | 100% | 100% | 100% |
| Argentina                       | 100% | 100% | 100% | 100% | 100% | 100% |
| Colombia                        | 100% | 100% | 100% | 100% | 100% | 100% |

SI 3 Table 5: *GDP using 2011 PPP coverage at the regional level based on country level data for 5 years (2010-2015). Color scheme indicates high (green) to low- coverage.*

| GCAM_region_name                | 2010 | 2011 | 2012 | 2013 | 2014 | 2015 |
|---------------------------------|------|------|------|------|------|------|
| USA                             | 100% | 100% | 100% | 100% | 100% | 100% |
| Africa_Eastern                  | 40%  | 42%  | 26%  | 16%  | 5%   | 0%   |
| Africa_Northern                 | 71%  | 77%  | 65%  | 37%  | 38%  | 39%  |
| Africa_Southern                 | 55%  | 38%  | 35%  | 17%  | 17%  | 17%  |
| Africa_Western                  | 95%  | 31%  | 27%  | 24%  | 14%  | 6%   |
| Australia_NZ                    | 100% | 100% | 100% | 100% | 100% | 11%  |
| Brazil                          | 100% | 100% | 100% | 100% | 100% | 100% |
| Canada                          | 100% | 100% | 100% | 100% | 100% | 100% |
| Central America and Caribbean   | 73%  | 72%  | 72%  | 70%  | 68%  | 53%  |
| Central Asia                    | 62%  | 62%  | 62%  | 62%  | 61%  | 58%  |
| China                           | 100% | 100% | 96%  | 96%  | 97%  | 97%  |
| EU-12                           | 87%  | 87%  | 87%  | 87%  | 87%  | 87%  |
| EU-15                           | 100% | 100% | 100% | 100% | 100% | 100% |
| Europe_Eastern                  | 100% | 100% | 100% | 100% | 100% | 100% |
| Europe_Non_EU                   | 100% | 100% | 98%  | 97%  | 97%  | 97%  |
| European Free Trade Association | 100% | 100% | 100% | 100% | 100% | 100% |
| India                           | 100% | 100% | 100% | 0%   | 0%   | 0%   |
| Indonesia                       | 100% | 100% | 100% | 100% | 100% | 100% |
| Japan                           | 100% | 100% | 100% | 100% | 100% | 100% |
| Mexico                          | 100% | 100% | 100% | 100% | 100% | 0%   |
| Middle East                     | 75%  | 75%  | 75%  | 65%  | 32%  | 31%  |
| Pakistan                        | 100% | 100% | 100% | 100% | 100% | 0%   |
| Russia                          | 100% | 100% | 100% | 100% | 100% | 100% |
| South Africa                    | 100% | 100% | 100% | 100% | 100% | 100% |
| South America_Northern          | 98%  | 98%  | 98%  | 98%  | 98%  | 0%   |
| South America_Southern          | 100% | 100% | 100% | 100% | 100% | 100% |
| South Asia                      | 100% | 44%  | 37%  | 28%  | 0%   | 0%   |
| South Korea                     | 100% | 100% | 100% | 100% | 100% | 100% |
| Southeast Asia                  | 94%  | 93%  | 74%  | 74%  | 73%  | 46%  |
| Taiwan                          | 100% | 100% | 100% | 100% | 100% | 100% |
| Argentina                       | 100% | 100% | 100% | 100% | 100% | 100% |
| Colombia                        | 100% | 100% | 100% | 100% | 100% | 100% |
